# Supplementary material
Source: Springer Nature journal article supplement (https://www.springermedizin.de/resource/supplementary/12939_2012_342_MOESM1_ESM.pdf/9550942)

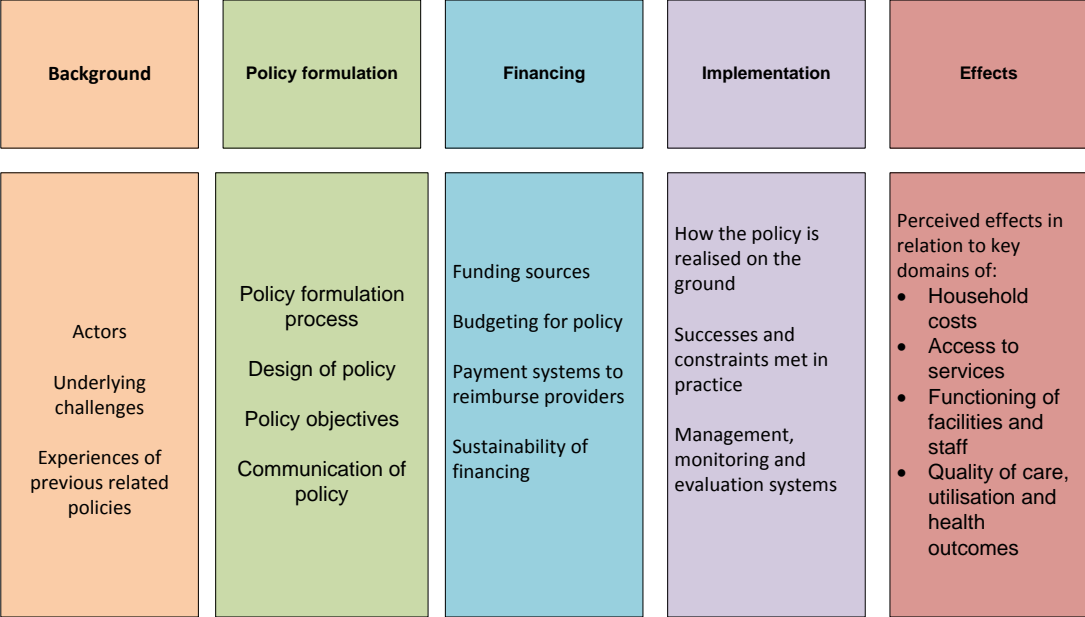

Overall views and recommendations of key stakeholders

Supplement: MOESM1 [file 9550942]
